# Supplementary material
Source: Research Square preprint supplement (doi:10.21203/rs.3.rs-9436391/v1)
Supplement: Supplementary file 1 [file 9cf035f093bcb9acff1f7cb2.docx]

**Supplementary Methods**

**S1 Participants**

AD, aMCI, and SCD subjects were continuously recruited from the Memory Clinic and Neurology Department of China-Japan Friendship Hospital and Nanjing Drum Tower Hospital. The diagnostic criteria for AD were based on the NINCDS-ADRDA guidelines [1], the 2011 international diagnostic criteria guidelines formulated by the National Institute on Aging and Alzheimer’s Association (NIA-AA) [2] and IWG-2 criteria [3].

The criteria for aMCI subjects followed Petersen's 1999 diagnostic guidelines [4], which are: (1) the presence of memory decline complaints, confirmed by an informant; (2) cognitive decline in one (or more) domains without significant impairment in daily living activities, and not meeting the diagnostic criteria for dementia; (3) objective impairment in episodic memory (a reduction of at least 1.5 standard deviations on one or more tests); (4) a clinical dementia rating (CDR) score of 0.5.

The diagnostic criteria for SCD followed the research standards published by the SCD International Working Group in 2014 [5] and updated in 2020 [6], requiring the following: (1) a self-perceived, persistent decline in cognitive ability compared to a previous normal state, unrelated to acute events; (2) performance within the normal range in standardized cognitive tests after adjusting for age, gender, and education level, without meeting the diagnostic criteria for MCI. Thus, the inclusion criteria for SCD in this study were: (1) clear and persistent complaints of memory and cognitive decline; (2) onset within the past five years, with an onset age of ≥50 years; (3) completion of a full set of neuropsychological tests, with no objective cognitive impairment.

All newly recruited AD, aMCI, and SCD subjects underwent a complete neuropsychological test and MRI examination. Simultaneously, age- and sex-matched healthy controls (HCs) were recruited from the local community, with their cognitive status assessed by the MMSE and MoCA.

Exclusion criteria for all subjects included: (1) a history of neurological and psychiatric diseases; (2) metabolic diseases or major illnesses; (3) alcohol or drug abuse; (4) contraindications for MRI examination; (5) abnormal findings on routine brain imaging; (6) significant head movement artifacts on MR images. (7) MR data quality does not meet analytical standards

**S2 MRI Acquisition**

In China-Japan Friendship Hospital site, MRI data were collected using a 3.0 Tesla MR scanner (General Electric, Discovery MR750, Milwaukee, WI, United States) with an eight-channel head coil. The scanning protocol included a 3D T1-weighted fast spoiled gradient-echo (3D-FSPGR) sequence for structural image, a 3D multi-echo gradient-echo (3D-mGRE) sequence for susceptibility mapping, a single shot gradient recalled echo-planar imaging (GRE-SS-EPI) sequence for rs-fMRI and a spin-echo echo-planar (EPI) sequence for diffusion MRI (dMRI). Detailed parameters were as follow: (1) 3D-FSPGR: repetition time (TR) = 6.7 ms, echo time (TE) = 2.9 ms, flip angle = 12°, slice thickness = 1 mm, field of view (FOV) = 256 × 256 mm, voxel size = 1 × 1 × 1 mm3; (2) 3D-mGRE: TE1st/ΔTE/TE8th = 3.19 ms/2.37 ms/ 19.77ms, TR = 22.9 ms, bandwidth = 62.5 Hz/pixel, slice thickness = 1.0 mm, FOV = 256 mm × 256 mm, voxel size = 1 × 1 × 1 mm³; (3) GRE-SS-EPI: TR = 2000 ms, TE = 30 ms, flip angle = 90°, slice thickness = 3.5 mm, slice spacing = 0.7 mm, FOV = 224 mm × 224 mm, voxel size = 3.5 × 3.5 × 3.5 mm³, with 240 time points; (4) Diffusion-weighted EPI: TR = 8028 ms, TE = 81.8 ms, flip angle = 90◦, slice thickness = 2 mm, FOV = 240 mm × 240 mm, voxel size = 2 × 2 × 2 mm3, with 64 diffusion-weighted directions using a b value of 1000s/mm2 and five images with a b value of 0 s/mm2.

In Nanjing Drum Tower Hospital site, all participants underwent scanning on a 3.0-Tesla MRI scanner (Philips Ingenia CX) with a 32-channel head coil. Structural 3D-T1w images were acquired with the following parameters: a repetition time (TR) = 8.37 ms; echo time (TE) = 3.89 ms; flip angle = 8°; field of view (FOV) = 256 mm×256 mm; voxel size = 1×1×1 mm3. The 3D multi-echo gradient-echo (mGRE) sequence was acquired for susceptibility analysis, with the following parameters: TR= 51 ms; TEs: TE1st/△TE/TE6th = 7/7/ 42 ms; flip angle = 20°; FOV = 288 mm×288 mm; voxel size = 0.75×0.75×2 mm3. The FEEPI was acquired for rs-fMRI analysis, with the following parameters: TR = 2000 ms, TE = 30 ms, flip angle = 90°, slice thickness = 4.0 mm, slice spacing = 4 mm, voxel size = 3 × 3 × 4 mm³, with 230 time points. The DTI sequence was used with the parameters: TR = 2993 ms, TE = 75.44 ms, flip angle = 90◦, slice thickness = 2 mm, voxel size = 2 × 2 × 2 mm3, with 128 diffusion-weighted directions using a b value of 1000s/mm2 and one image with a b value of 0 s/mm2.

**S3 Data processing**

**S3.1 MRI Preprocessing**

T1-weighted images were processed using the FreeSurfer v6.0 recon-all pipeline [7], which automatically performs skull stripping, intensity normalization, tissue segmentation, and cortical and subcortical parcellation. The aseg and aparc atlases were used to generate region-of-interest (ROI) masks. Intracranial volume was derived from the aseg statistics file and used to normalize volumetric measures such as CSF, perivascular space (PVS), and choroid plexus (CP) volumes.

Diffusion-weighted images were first denoised using MP-PCA and corrected for Gibbs-ringing artifacts [8]. Eddy current distortions and head motion were corrected using a model with outlier replacement, and susceptibility-induced distortions were addressed using field-map–based adjustments. A bi-tensor model was fitted using Accelerated Microstructure Imaging via Convex Optimization (AMICO) to estimate free-water content, while diffusion tensors were reconstructed to derive fractional anisotropy and mean diffusivity maps [9]. All diffusion-derived metrics were registered to the T1 anatomical space using boundary-based registration to ensure anatomical correspondence across modalities.

Preprocessing of resting-state fMRI included slice-timing correction, rigid-body motion realignment, and two-stage nuisance regression incorporating 24 motion parameters and CSF and white-matter signals. High-motion volumes were interpolated or censored according to framewise displacement thresholds. Time series were temporally band-pass filtered between 0.01 and 0.1 Hz and spatially smoothed with a 6 mm full-width half-maximum Gaussian kernel. All fMRI volumes were co-registered to the participant’s T1 image and normalized to standard space. Ventricular CSF masks were eroded to minimize partial-volume contamination before CSF time series extraction [10].

**S3.2 Computation of the PVS Index**

The PVS index consisted of CSF volume, choroid plexus (CP) volume, perivascular space (PVS) volume, free-water (FW) content, and the DTI-ALPS index. CSF and WM masks derived from FreeSurfer (see S.3.1) were used to extract CSF volumes and WM regions. CP volumes were obtained from T1 images using a deep-learning segmentation model (<https://github.com/hettk/chp_seg>) [11]. PVS volume was computed within the white matter by applying a multi-scale Jerman vesselness filter to structural images [12], followed by percentile-based thresholding and morphological refinement to obtain binary PVS masks [13]. FW maps were taken from the AMICO free-water model, and FW volume was calculated as the total FW voxel sum within WM excluding PVS regions. All volumetric metrics (CSF, CP, PVS, FW) were normalized by intracranial volume to account for interindividual differences in brain size.

The DTI-ALPS index was computed following the LOFT framework [8]. ROIs were placed in projection (SCR) and association (SLF) fibers, and diffusivities along x-, y-, and z-axes were extracted. The ALPS index was calculated as:

+ )/(+

**S3.3 BOLD–CSF Coupling Analysis**

BOLD–CSF coupling was computed following established glymphatic fMRI protocols [14, 15]. After preprocessing, the global BOLD (gBOLD) signal was extracted from gray-matter voxels defined by the BNA246 atlas. Regional BOLD signals were obtained by averaging across frontal (fBOLD), temporal (tBOLD), and parietal (pBOLD) parcels, respectively. To obtain the CSF inflow signal, an eroded inferior-ventricle mask was applied to the lower slices of each subject’s fMRI, ensuring consistent cerebellar coverage and minimizing partial-volume effects. Non-zero voxels within these slices were averaged to form the CSF time series. Both BOLD and CSF signals were normalized to unit variance across subjects.

Coupling strength was quantified by computing the cross-correlation function between the CSF signal and the negative temporal derivative of each BOLD signal. Cross-correlation was calculated over time lags ranging from –9 s to +9 s, and the lag corresponding to the most negative correlation was taken as each subject’s coupling value; for gBOLD, the peak typically occurred at +3 s. This procedure was repeated for regional BOLD signals to obtain fBOLD-CSF, tBOLD-CSF, and pBOLD-CSF coupling.

Statistical significance of coupling values was assessed using a permutation framework in which BOLD and CSF time series were randomly reassigned across subjects for 1,000 iterations. The empirical p-value was defined as the proportion of permutations in which the randomized correlation exceeded the true negative coupling. Subjects with more than 20% motion-censored volumes were excluded from coupling analyses.

**S3.4 Reconstruction of sub-voxel QSM maps and spatial normalization**

The susceptibility maps were generated from 3D-mGRE data through the standard pipeline in the STISuite (http://people.eecs.berkeley.edu/~chunlei.liu/software.html) and APART-QSM toolboxes (<https://github.com/AMRI-Lab/APART-QSM>) [16]. In short, the multi-echo raw phase images were firstly unwrapped through Laplacian-based method [17, 18] , and brain mask was extracted from the averaged magnitude image across echoes using brain extraction tool (BET) in FSL version 6.0.0 [19]. Then, the local field map was calculated with brain mask using varying spherical kernel filtering algorithm (LBV) [20]. QSM image was reconstructed from tissue field map through STAR-QSM method [21]. Next, the R2 map was calculated using a mono-exponential function in STISuite. Lastly, the QSM, tissue phase, multi-echo magnitude and R2 data were combined into the APART-QSM [16] to generate paramagnetic (χpara) and diamagnetic susceptibility (χdia) maps. To avoid complications of explanations in signal source, the absolute diamagnetic susceptibility maps (|χdia|) were used for subsequential analyses. Higher χpara and |χdia| values indicate greater amount of paramagnetic and diamagnetic content in brain tissue, respectively.

Firstly, individual T1 images were normalized to MNI (Montreal Neurological Institute) standard space using the deformable b-spline co-registration routine in ANTs (Advanced Normalization Tools) [22]. The first-echo of magnitude images with radio-frequency bias-correction were rigidly co-registered to their corresponding T1 images by affine approach in ANTs. Then, paramagnetic (χpara) and absolute diamagnetic susceptibility (|χdia|) maps were warped to MNI space using the combined deformation matrixes above through “antsApplyTransforms” algorithm.

In addition, T1 structural images were segmented into gray matter and white matter probabilistic maps using SPM12 (<http://www.fil.ion.ucl.ac.uk/spm/software/spm12>). The probabilistic maps were also transformed into the MNI space through above individual T1 normalization deformations, and the final binary brain masks excluding nonparenchymal voxels were generated with a 0.6 threshold on tissue probability. The final binary brain mask was used to restrict the parenchymal boundary in the normalized paramagnetic and absolute diamagnetic susceptibility maps, which more accurately masked out CSF regions.

**S4 Statistical Analysis**

**S4.1 Correlation Analysis**

Cross-modal associations between glymphatic metrics and QSM-derived susceptibility indices were assessed at both ROI and network levels. Because subject availability varied across modalities and centers, all datasets were first harmonized by aligning glymphatic measures—including global and regional BOLD–CSF coupling, FW, CSF index, PVS volume, DTI-ALPS, BF, and CP, to the QSM subject list within each center. Subjects lacking valid QSM data were removed to ensure strict one-to-one correspondence, and centre-wise matrices were concatenated to form unified subject-by-feature datasets.

All glymphatic and susceptibility variables (|χdia| and χpara ) were then residualized for age, sex, and scanner using a standard linear regression framework. ROI-level features were derived by averaging QSM and glymphatic values within 28 anatomically defined regions [23, 24], while network-level features were computed by aggregating values within seven canonical functional networks (DMN, LIM, FPN, DAN, VAN, SMN, VIS).

Pairwise Pearson correlations were calculated between residualized glymphatic metrics and sub-voxel QSM susceptibility values to generate ROI-wise and network-wise correlation matrices. Statistical significance was assessed using two-tailed tests with false-discovery-rate (FDR) correction (q < 0.05). Robustness was confirmed through parallel correlation analyses with and without outlier winsorization, as well as comparing ROI- and network-level patterns for spatial consistency.

**S4.2 Partial Least Squares (PLS) Analysis**

To identify multivariate associations between glymphatic metrics and QSM-derived susceptibility patterns, we performed Partial Least Squares Correlation (PLS-C) analysis using residualized glymphatic features (Y) and QSM features (X). PLS was conducted separately for ROI-level and network-level QSM representations and separately for diamagnetic (|χdia|) and paramagnetic (χpara) components.

Prior to decomposition, all variables were z-scored across subjects. Cross-covariance matrices were decomposed using singular value decomposition (SVD), yielding latent variables (LVs) that maximally capture shared variance between X and Y. The significance of each LV was assessed using permutation testing (1,000 permutations), and feature stability was evaluated using bootstrap resampling (1,000 bootstraps). Bootstrap ratios were used to quantify the reliability of feature saliences, with |BR| ≥ 5 considered robust.

For significant LVs, we extracted (i) salience weights for QSM and glymphatic features, (ii) LV scores for each subject, and (iii) the proportion of cross-modal covariance explained by each LV. Group-wise LV score correlations and bootstrap confidence intervals were computed to characterize the effects of clinical progression. This multivariate framework enabled identification of coordinated glymphatic–susceptibility patterns that univariate correlations cannot capture.

**S4.3 Significant Glymphatic–QSM Feature Extraction**

Significant glymphatic–QSM feature pairs were assembled by integrating three complementary selection streams: (1) trend-significant pairs identified from the correlation-based disease-trend analysis, (2) trend-significant pairs identified from the PLS models, and (3) distance-significant pairs identified from the Euclidean group-separation analysis.

In the correlation stream, Fisher-z–transformed correlations between each glymphatic metric and sub-voxel QSM feature were regressed against ordered diagnostic stage (HC→SCD→MCI→AD), and pairs with significant linear trends (*p* < 0.05) were retained. In the PLS stream, we focused on LVs showing a significant disease trend in subject-wise LV scores, and retained glymphatic–QSM pairs whose features exhibited bootstrap-stable saliences (|BR| ≥ 2.8 / 5) within these LVs [25]. In the distance stream, each glymphatic–QSM pair was embedded in a two-dimensional feature space, and group separation across HC, SCD, MCI, and AD was quantified using a Euclidean distance statistic with permutation-based significance testing; pairs exceeding the predefined distance threshold and achieving permutation significance (*p* < 0.05) were labeled distance-significant [26].

All unique pairs flagged by any of the three streams were combined into a unified set of significant glymphatic–sub-voxel QSM feature pairs, and their residualized subject-wise values were extracted for downstream neurodegeneration latent factor (ND) construction, SEM, and disease-progression modelling.

**S4.4 Structural Equation Modelling (SEM)**

For each susceptibility domain (ROI_DIA, ROI_PARA, NET_DIA, NET_PARA), ND indicators were constructed from the significant glymphatic–sub-voxel QSM feature pairs identified in S.4.3 by multiplying the z-scored glymphatic and sub-voxel QSM values for each pair. Indicators with excessive missingness, near-zero variance, or high multicollinearity (|r| > 0.85) were removed, and all retained indicators were standardized. Diagnostic stage (HC to AD) and age- and sex-residualized MMSE scores were included as external variables. SEM models were specified using a single latent ND factor predicted by diagnostic stage and in turn predicting cognition (MMSE), with a direct group to cognition path included to estimate the indirect effect. Models were fit using robust maximum likelihood with full-information maximum likelihood for missing data, and only converged models without Heywood cases or residual-matrix violations were retained. Standardized path coefficients, indirect and total effects, model-fit indices, and factor loadings were extracted for interpretation.

**S4.5 Disease Progression Modelling (DPM)**

For each domain set, ND matrices composed of subject-wise ND vectors from the selected glymphatic–QSM pairs were assembled and z-scored. Pseudotime was then derived by applying PCA to the subject-by-feature ND matrix and using the first principal component—rescaled to the [0,1] interval and sign-adjusted to ensure positive association with disease severity—as a one-dimensional disease-continuum axis. ND trajectories were reconstructed by interpolating each ND pattern over a pseudotime grid using spline smoothing, producing smooth ND(t) functions that captured their temporal evolution. From these curves, onset time (initial deviation from baseline) and peak time (time of maximal ND deviation along the pseudotime axis) were computed as indices of early and rapid changes. Trajectories were normalized and clustered using k-means with correlation distance to identify shared temporal motifs. Pseudotime values, smoothed trajectories, onset metrics, peak metrics, and cluster labels were generated to interpret the progression of glymphatic–susceptibility alterations.

**Supplementary Results**

**S5.1 Supplementary results for PVS indices, BOLD–CSF Coupling, and NBF**

Complete age-, sex-, and scanner-adjusted ANCOVA results and post-hoc comparisons for all glymphatic structural (CSF, CP, PVS, FW, DTI-ALPS) and functional measures (gBOLD–CSF, tBOLD–CSF, fBOLD–CSF, pBOLD–CSF coupling, and BF volume) are provided in Supplementary Table S1.

Table S1`

| **Metric** | ***F* value (*p* value)** | **Multi-comparison** | ***t* value (*p* value)** | **Multi-comparison** | | ***t* value (*p* value)** |
| --- | --- | --- | --- | --- | --- | --- |
| *gBOLD-CSF coupling* | *3.44*  *(< 0.05)* | *AD vs HC* | *2.72*  *(< 0.05)* | *AD vs MCI* | *3*  *(< 0.05)* | |
| *fBOLD-CSF coupling* | *0.17*  *(0.92)* | *No significant post-hoc comparison* | | | | |
| *tBOLD-CSF coupling* | *2.71*  *(< 0.05)* | *AD vs MCI* | *2.75*  *(< 0.05)* |  |  | |
| *pBOLD-CSF coupling* | *1.6*  *(< 0.05)* | *No significant post-hoc comparison* | | | | |
| *BF* | *8.79*  *(< 0.001)* | *AD vs HC* | *-4.08*  *(< 0.001)* | *AD vs SCD* | *-5.58*  *(< 0.001)* | |
| *AD vs MCI* | *-3.86*  *(< 0.001)* |  |  | |
| *CSF* | *19.33*  *(< 0.001)* | *AD vs HC* | *4.33*  *(< 0.001)* | *AD vs SCD* | *5.15*  *(< 0.001)* | |
| *AD vs MCI* | *6.61*  *(< 0.001)* | *MCI vs HC* | *2.72*  *(< 0.05)* | |
| *CP* | *15.96*  *(< 0.001)* | *AD vs HC* | *4.24*  *(< 0.001)* | *AD vs SCD* | *5.21*  *(< 0.001)* | |
| *AD vs MCI* | *5.7*  *(< 0.001)* |  |  | |
| *FW`* | *31.55*  *(< 0.001)* | *AD vs HC* | *8.67*  *(< 0.001)* | *AD vs SCD* | *7.17*  *(< 0.001)* | |
| *AD vs MCI* | *8.8*  *(< 0.001)* |  |  | |
| *PVS* | *6.74*  *(< 0.001)* | *AD vs MCI* | *-3.12*  *(< 0.05)* | *MCI vs HC* | *3.81*  *(< 0.001)* | |
| *SCD vs HC* | *3.26*  *(< 0.05)* |  |  | |
| *DTI-ALPS* | *28.13*  *(< 0.001)* | *AD vs HC* | *-7.33*  *(< 0.001)* | *AD vs SCD* | *-7.88*  *(< 0.001)* | |
| *AD vs MCI* | *-6.96*  *(< 0.001)* |  |  | |

At the individual level, age showed robust associations with several glymphatic-related indices: BF, CSF, DTI-ALPS, CP, and FW all correlated significantly with age (*p* ≤ 0.001; |r| ≈ 0.12–0.56), whereas PVS and BOLD–CSF volume showed no age effect. Sex and scanner effects were evaluated using two-sample t-tests with FDR correction across metrics. After FDR correction, sex differences were significant for BF, CSF, ALPS, CP, FW, and PVS (*q* < 0.05; small-to-moderate Cohen’s d ≈ 0.20–0.61), but not for any BOLD–CSF coupling measure. Head-motion was primarily related to CSF, ALPS, CP, and FW (all *p* < 0.05), with negligible associations for BF, PVS, and the coupling indices. Scanner effects were evaluated using two-sample t-tests performed on covariate-adjusted residuals, in which each glymphatic metric was first regressed onto age, sex, and diagnostic group. Significant scanner effects were observed for CSF, CP, FW, DTI-ALPS, PVS, BF, and two of the BOLD–CSF coupling indices (*q* < 0.05), consistent with known scanner sensitivity in volumetric, diffusion-derived, and coupling measures. To ensure that subsequent cross-modal analyses were not confounded by redundancy among glymphatic metrics, we additionally quantified their inter-correlations; the resulting correlation matrix is shown in Supplementary Fig. S1, where no pair of measures approached near-collinearity (|r| > 0.80) and significant associations are marked with asterisks.


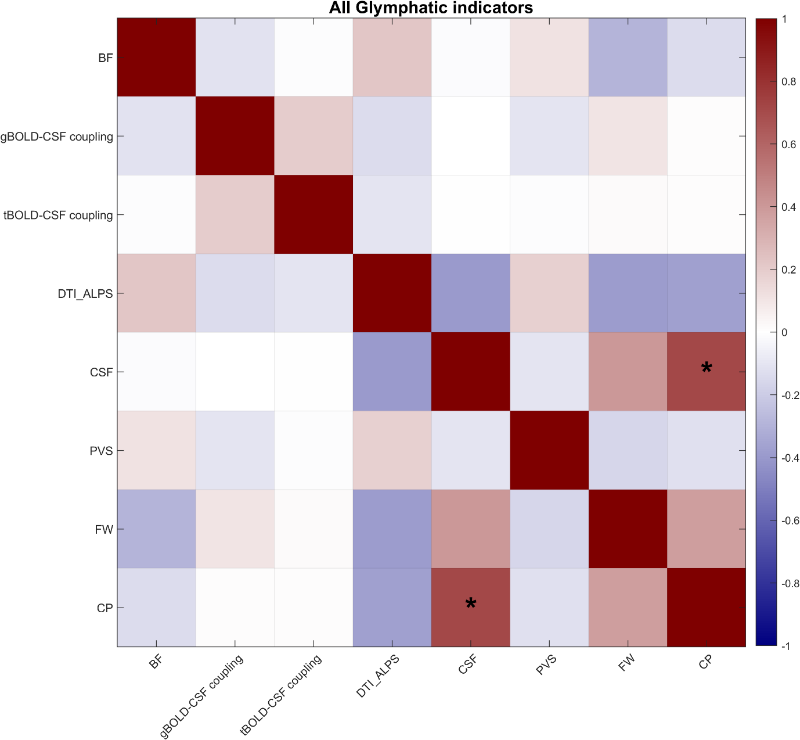


**Supplementary Fig. S1. Pairwise correlations among glymphatic-related measures.** The heatmap displays Pearson correlations across all glymphatic and perivascular indicators. Moderate correlations were observed among volumetric indices (CSF, CP, PVS) and between FW and DTI-ALPS, whereas both gBOLD–CSF and tBOLD–CSF coupling showed negligible associations with other measures. No measure pair demonstrated near-collinearity (|r| > 0.80). Significant correlations are marked with asterisks.

**S5.2 Supplementary results for |χdia| and χpara metrics**

Full ANCOVA statistics and post-hoc comparisons for all ROI-wise and network-wise |χdia| and χpara measures are provided in Supplementary Table S2. As summarized in the main text, both diamagnetic and paramagnetic susceptibility showed widespread group differences, particularly within temporal, parietal, and limbic regions. Supplementary Table S2 reports the complete set of F values and pairwise t-tests.

Table S2

| **Metric** | **ROI / network** | ***F* value (*p* value)** | **Multi-comparison** | ***t* value (*p* value)** | **Multi-comparison** | ***t* value (*p* value)** | **Multi-comparison** | ***t* value (*p* value)** | |
| --- | --- | --- | --- | --- | --- | --- | --- | --- | --- |
| |χdia|  *(ROI)* | *MFG* | *9.71 (<0.001)* | *AD vs MCI* | *-5.49 (<0.001)* | *AD vs SCD* | *-4.96 (<0.001)* |  | |  |
| *IFG* | *7.68 (<0.001)* | *AD vs MCI* | *-4.86 (<0.001)* | *AD vs SCD* | *-4.47 (<0.001)* |  | |  |
|  | *OG* | *15.72 (<0.001)* | *AD vs MCI* | *-7.24 (<0.001)* | *AD vs SCD* | *-6.81 (<0.001)* | *AD vs HC* | | *-3.01 (<0.05)* |
|  |  |  | *SCD vs HC* | *2.69 (<0.05)* |  |  |  | |  |
|  | *PG* | *11.36 (<0.001)* | *AD vs MCI* | *-5.9 (<0.001)* | *AD vs SCD* | *-4.5 (<0.001)* | *MCI vs HC* | | *3.23 (<0.05)* |
|  | *PL* | *11.76 (<0.001)* | *AD vs MCI* | *-5.98 (<0.001)* | *AD vs SCD* | *-4.92 (<0.001)* | *MCI vs HC* | | *3.23 (<0.05)* |
|  | *STG* | *5.03 (<0.001)* | *AD vs MCI* | *-3.54 (<0.05)* | *AD vs SCD* | *-3.32 (<0.05)* |  | |  |
|  | *MTG* | *7.45 (<0.001)* | *AD vs MCI* | *-4.9 (<0.001)* | *AD vs SCD* | *-4.3 (<0.001)* |  | |  |
|  | *ITG* | *12.81 (<0.001)* | *AD vs MCI* | *-6.83 (<0.001)* | *AD vs SCD* | *-6.13 (<0.001)* | *AD vs HC* | | *-3.01 (<0.05)* |
|  | *FuG* | *8.00 (<0.001)* | *AD vs MCI* | *-4.96 (<0.001)* | *AD vs SCD* | *-5.02 (<0.001)* |  | |  |
|  | *PhG* | *7.99*  *(<0.001)* | *AD vs MCI* | *-5.45 (<0.001)* | *AD vs SCD* | *-4.66 (<0.001)* |  | |  |
|  | *Psts* | *9.51*  *(<0.001)* | *AD vs MCI* | *2.97 (<0.05)* | *AD vs SCD* | *5.81 (<0.001)* | *AD vs HC* | | *3.3 (<0.05)* |
|  | *SPL* | *10.45*  *(<0.001)* | *AD vs MCI* | *-5.0 (<0.001)7* | *AD vs SCD* | *-4.83 (<0.001)* | *MCI vs HC* | | *2.92 (<0.05)* |
|  | *Pcun* | *9.75*  *(<0.001)* | *AD vs MCI* | *-5.24 (<0.001)* | *AD vs SCD* | *-4.66 (<0.001)* | *MCI vs HC* | | *2.72 (<0.05)* |
|  | *PoG* | *12.36*  *(<0.001)* | *AD vs MCI* | *-5.87 (<0.001)* | *AD vs SCD* | *-4.81 (<0.001)* | *MCI vs HC* | | *3.48 (<0.05)* |
|  | *INS* | *6.65 (<0.001)* | *AD vs MCI* | *-4.58 (<0.001)* | *AD vs SCD* | *-4.35 (<0.001)* |  | |  |
|  | *CG* | *9.61 (<0.001)* | *AD vs MCI* | *-5.55 (<0.001)* | *AD vs SCD* | *-5.24 (<0.001)* | *AD vs HC* | | *-3.04 (<0.05)* |
|  | *BG* | *7.98 (<0.001)* | *AD vs MCI* | *-4.89 (<0.001)* | *AD vs SCD* | *-4.05 (<0.001)* | *MCI vs HC* | | *2.73 (<0.05)* |
|  | *Put* | *5.02 (<0.001)* | *AD vs MCI* | *-3.75 (<0.05)* | *AD vs SCD* | *-3.35 (<0.05)* |  | |  |
|  | *DN* | *12.73 (<0.001)* | *AD vs MCI* | *4.14 (<0.001)* | *AD vs SCD* | *5.59 (<0.001)* | *SCD vs HC* | | *-3.92 (<0.001)* |
| χpara  *(ROI)* | *SFG* | *5.98 (<0.001)* | *AD vs MCI* | *-3.96 (<0.001)* | *AD vs SCD* | *-3.73 (<0.05)* |  | |  |
| *OG* | *13.37 (<0.001)* | *AD vs MCI* | *-6.29 (<0.001)* | *AD vs SCD* | *-6.19 (<0.001)* | *AD vs HC* | | *-2.7 (<0.05)* |
|  | *PL* | *9.35 (<0.001)* | *AD vs MCI* | *4.43 (<0.001)* | *AD vs SCD* | *4.87 (<0.001)* |  | |  |
|  | *STG* | *13.76 (<0.001) (<0.001)* | *AD vs MCI* | *-6.39 (<0.001)* | *AD vs SCD* | *-6.19 (<0.001)* | *AD vs HC* | | *-3.29 (<0.05)* |
|  | *MTG* | *12.54 (<0.001)* | *AD vs MCI* | *-6.23 (<0.001)* | *AD vs SCD* | *-5.94 (<0.001)* |  | |  |
|  | *ITG* | *13.86 (<0.001)* | *AD vs MCI* | *-7.03 (<0.001)* | *AD vs SCD* | *-6.38 (<0.001)* | *AD vs HC* | | *-3.31 (<0.05)* |
|  | *FuG* | *12.25 (<0.001)* | *AD vs MCI* | *-6.35 (<0.001)* | *AD vs SCD* | *-6 (<0.001)* | *AD vs HC* | | *-2.93 (<0.05)* |
|  | *PhG* | *15.78 (<0.001)* | *AD vs MCI* | *-6.89 (<0.001)* | *AD vs SCD* | *-7.02 (<0.001)* | *AD vs HC* | | *-3.34 (<0.05)* |
|  | *Psts* | *8.65 (<0.001)* | *AD vs MCI* | *-5.23 (<0.001)* | *AD vs SCD* | *-5.21 (<0.001)* | *AD vs HC* | | *-2.97 (<0.05)* |
|  | *SPL* | *12.66 (<0.001)* | *AD vs MCI* | *4.23 (<0.001)* | *AD vs SCD* | *5.42 (<0.001)* | *AD vs HC* | | *4.29* |
|  | *Pcun* | *16.16 (<0.001)* | *AD vs MCI* | *6.88 (<0.001)* | *AD vs SCD* | *5.81 (<0.001)* | *AD vs HC* | | *3.67 (<0.05)* |
|  |  |  | *MCI vs HC* | *-2.71 (<0.05)* |  |  |  | |  |
|  | *PoG* | *6.89 (<0.001)* | *AD vs MCI* | *2.85 (<0.05)* | *AD vs SCD* | *4.57 (<0.001)* | *AD vs HC* | | *2.73 (<0.05)* |
|  | *CG* | *8.31*  *(<0.001)* | *AD vs MCI* | *-4.89 (<0.001)* | *AD vs SCD* | *-4.25 (<0.001)* |  | |  |
|  | *Hipp* | *6.99*  *(<0.001)* | *AD vs MCI* | *-4.49 (<0.001)* | *AD vs SCD* | *-4.56 (<0.001)* |  | |  |
| |χdia|  *(Network)* | *SOM* | *9.12*  *(<0.001)* | *AD vs MCI* | *-5.04 (<0.001)* | *AD vs SCD* | *-3.96 (<0.001)* | *MCI vs HC* | | *3.12 (<0.05)* |
| *DAN* | *8.22*  *(<0.001)* | *AD vs MCI* | *-4.54 (<0.001)* | *AD vs SCD* | *-5.08 (<0.001)* |  | |  |
|  | *LIM* | *15.01*  *(<0.001)* | *AD vs MCI* | *-7.25 (<0.001)* | *AD vs SCD* | *-6.58 (<0.001)* | *AD vs HC* | | *-3.04 (<0.05)* |
|  | *FPN* | *11.81*  *(<0.001)* | *AD vs MCI* | *-6.39 (<0.001)* | *AD vs SCD* | *-5.76 (<0.001)* |  | |  |
|  | *DMN* | *9.91*  *(<0.001)* | *AD vs MCI* | *-5.45 (<0.001)* | *AD vs SCD* | *-5.1 (<0.001)* |  | |  |
| χpara  *(Network)* | *VIS* | *7.40*  *(<0.001)* | *AD vs MCI* | *-4.58 (<0.001)* | *AD vs SCD* | *-4.18 (<0.001)* |  | |  |
| *LIM* | *15.19*  *(<0.001)* | *AD vs MCI* | *-7.18 (<0.001)* | *AD vs SCD* | *-6.72 (<0.001)* | *AD vs HC* | | *-3.24 (<0.05)* |
|  | *DMN* | *11.95*  *(<0.001)* | *AD vs MCI* | *-5.85 (<0.001)* | *AD vs SCD* | *-5.53 (<0.001)* | *MCI vs HC* | | *2.78 (<0.05)* |

At the individual level, there were no significant age or sex effects on any |χdia|or χpara metrics (*p* > 0.05), consistent with the absence of systematic covariate dependencies in susceptibility measures. Scanner effects were assessed using two-sample t-tests performed on residualized susceptibility values, where each ROI- and network-level QSM feature was first regressed onto age, sex, and diagnostic group. Multiple |χdia| and χpara regions showed significant scanner-related baseline offsets (*q* < 0.05), particularly in temporal, parietal, and limbic cortices, consistent with known cross-vendor differences in echo times and multi-echo GRE reconstruction.

**S6 Supplementary results for Multistage pattern identification**

This section presents the Multistage pattern identification across system-level trend, PLS contribution and group separation (Supplementary Figure S2). For visualization in the main text (Fig. 3), results from these complementary criteria were further summarized using a consensus mask to highlight glymphatic–susceptibility pairs consistently identified across methods; this mask was used solely for figure presentation and did not influence statistical analyses or feature selection.


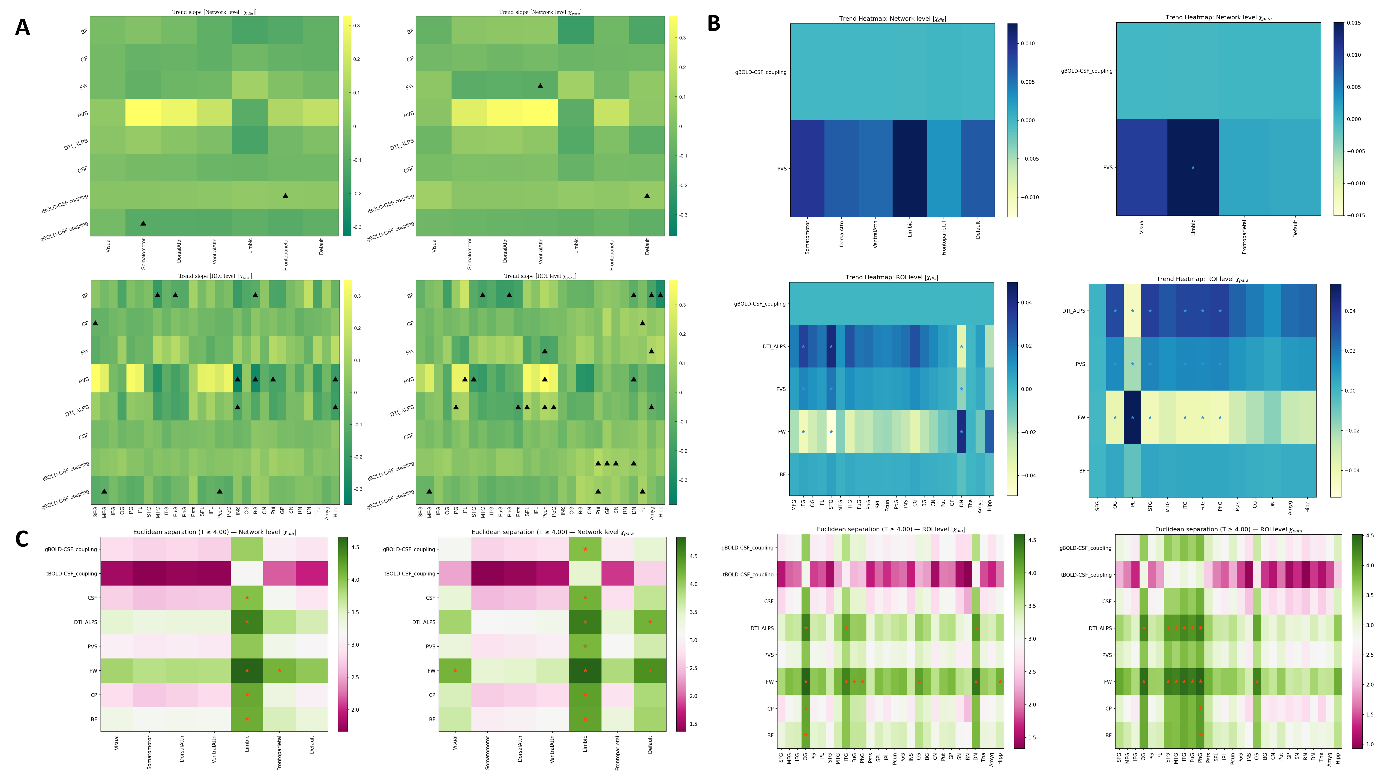


**Supplementary Fig. S2. Multistage pattern identification for glymphatic–susceptibility associations.** (A) Trend-based screening across the AD continuum, with each glymphatic–sub-voxel QSM pair tested for monotonic progression effects. Colors represent trend coefficients, and asterisks denote significant linear trends (p < 0.05). (B) PLSC contribution filtering, illustrating the bootstrap ratio (BR) of each glymphatic variable to the dominant latent susceptibility mode (LV1) for both |χdia| and χpara. Colors represent BR values, and asterisks indicate significant LV1 contributions (|BR| ≥ 2.8). (C) Euclidean group separation analysis showing the discriminative strength of each glymphatic–sub-voxel QSM pair across diagnostic categories. Colors reflect Euclidean T-scores, and asterisks mark pairs exceeding the selection threshold (T ≥ 4).

**References:**

1. Dubois, B., et al., *Research criteria for the diagnosis of Alzheimer's disease: revising the NINCDS–ADRDA criteria.* The Lancet Neurology, 2007. **6**(8): p. 734-746.

2. Jack Jr, C.R., et al., *NIA‐AA research framework: toward a biological definition of Alzheimer's disease.* Alzheimer's & dementia, 2018. **14**(4): p. 535-562.

3. Dubois, B., et al., *Clinical diagnosis of Alzheimer's disease: recommendations of the International Working Group.* The Lancet Neurology, 2021. **20**(6): p. 484-496.

4. Petersen, R.C., et al., *Mild cognitive impairment: clinical characterization and outcome.* Archives of neurology, 1999. **56**(3): p. 303-308.

5. Jessen, F., et al., *A conceptual framework for research on subjective cognitive decline in preclinical Alzheimer's disease.* Alzheimer's & dementia, 2014. **10**(6): p. 844-852.

6. Jessen, F., et al., *The characterisation of subjective cognitive decline.* The Lancet Neurology, 2020. **19**(3): p. 271-278.

7. Fischl, B., *FreeSurfer.* Neuroimage, 2012. **62**(2): p. 774-781.

8. Liu, X., et al., *Cross-vendor test-retest validation of diffusion tensor image analysis along the perivascular space (DTI-ALPS) for evaluating glymphatic system function.* Aging and disease, 2024. **15**(4): p. 1885.

9. Daducci, A., et al., *Accelerated microstructure imaging via convex optimization (AMICO) from diffusion MRI data.* Neuroimage, 2015. **105**: p. 32-44.

10. Gu, Y., et al., *Transient arousal modulations contribute to resting-state functional connectivity changes associated with head motion parameters.* Cerebral Cortex, 2020. **30**(10): p. 5242-5256.

11. Eisma, J.J., et al., *Deep learning segmentation of the choroid plexus from structural magnetic resonance imaging (MRI): validation and normative ranges across the adult lifespan.* Fluids and Barriers of the CNS, 2024. **21**(1): p. 21.

12. Jerman, T., et al., *Enhancement of vascular structures in 3D and 2D angiographic images.* IEEE transactions on medical imaging, 2016. **35**(9): p. 2107-2118.

13. Lin, S., et al., *Association of MRI indexes of the perivascular space network and cognitive impairment in patients with obstructive sleep apnea.* Radiology, 2024. **311**(3): p. e232274.

14. Fultz, N.E., et al., *Coupled electrophysiological, hemodynamic, and cerebrospinal fluid oscillations in human sleep.* Science, 2019. **366**(6465): p. 628-631.

15. Han, F., et al., *Reduced coupling between cerebrospinal fluid flow and global brain activity is linked to Alzheimer disease–related pathology.* PLoS biology, 2021. **19**(6): p. e3001233.

16. Li, Z., et al., *APART-QSM: An improved sub-voxel quantitative susceptibility mapping for susceptibility source separation using an iterative data fitting method.* Neuroimage, 2023. **274**: p. 120148.

17. Li, W., et al., *Integrated Laplacian‐based phase unwrapping and background phase removal for quantitative susceptibility mapping.* NMR in Biomedicine, 2014. **27**(2): p. 219-227.

18. Li, W., B. Wu, and C. Liu, *Quantitative susceptibility mapping of human brain reflects spatial variation in tissue composition.* Neuroimage, 2011. **55**(4): p. 1645-1656.

19. Smith, S.M., et al., *Advances in functional and structural MR image analysis and implementation as FSL.* Neuroimage, 2004. **23**: p. S208-S219.

20. Wu, B., et al., *Whole brain susceptibility mapping using compressed sensing.* Magnetic resonance in medicine, 2012. **67**(1): p. 137-147.

21. Wei, H., et al., *Streaking artifact reduction for quantitative susceptibility mapping of sources with large dynamic range.* NMR in Biomedicine, 2015. **28**(10): p. 1294-1303.

22. Klein, A., et al., *Evaluation of volume-based and surface-based brain image registration methods.* Neuroimage, 2010. **51**(1): p. 214-220.

23. Ahmed, M., et al., *The diamagnetic component map from quantitative susceptibility mapping (QSM) source separation reveals pathological alteration in Alzheimer’s disease-driven neurodegeneration.* Neuroimage, 2023. **280**: p. 120357.

24. Kim, H.-G., et al., *Quantitative susceptibility mapping to evaluate the early stage of Alzheimer's disease.* NeuroImage: Clinical, 2017. **16**: p. 429-438.

25. Krishnan, A., et al., *Partial Least Squares (PLS) methods for neuroimaging: a tutorial and review.* Neuroimage, 2011. **56**(2): p. 455-475.

26. Reiss, P.T., et al., *On distance-based permutation tests for between-group comparisons.* Biometrics, 2010. **66**(2): p. 636-643.
